# Supplementary material for: Anti-Spike Antibodies Present in the Milk of SARS-CoV-2 Vaccinated Mothers Are Complement-Activating
Source: MDPI journal article supplement (doi:10.3390/ijms24054395), 2023-02-23
Supplement: s1 [file s1]

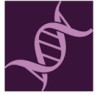

*Supplementary Material to*

## **Anti-Spike Antibodies Present in the Milk of SARS-CoV-2 Vaccinated Mothers Are Complement-Activating**

**Chiara Agostinis <sup>1,\*†</sup>, Miriam Toffoli <sup>2,†</sup>, Andrea Balduiti <sup>1</sup>, Alessandro Mangogna <sup>1</sup>, Hadida Yasmin <sup>3</sup>, Chiara Ragazzon <sup>2</sup>, Silvia Pegoraro <sup>1</sup>, Giuseppina Campisciano <sup>1</sup>, Guglielmo Stabile <sup>1</sup>, Gabriella Zito <sup>1</sup>, Uday Kishore <sup>4</sup>, Manola Comar <sup>1,2</sup>, Federica Scrimin <sup>1</sup>, Roberta Bulla <sup>5,‡,\*</sup> and Giuseppe Ricci <sup>1,2,‡</sup>**

<sup>1</sup> Institute for Maternal and Child Health, IRCCS Burlo Garofolo, 34137 Trieste, Italy

<sup>2</sup> Department of Medical, Surgical and Health Science, University of Trieste, 34129 Trieste, Italy

<sup>3</sup> Immunology and Cell Biology Laboratory, Department of Zoology, Cooch Behar Panchanan Barma University, Cooch Behar 736101, West Bengal, India

<sup>4</sup> Department of Veterinary Medicine, United Arab Emirates University (UAEU), Al Ain P.O. Box 15551, United Arab Emirates

<sup>5</sup> Department of Life Sciences, University of Trieste, 34127 Trieste, Italy

\* Correspondence: cagostinis@units.it (C.A.); rbulla@units.it (R.B.);  
Tel.: +39-040-558-8646 (R.B.); Fax +39-040-558-4023 (R.B.)

† These authors contributed equally to this work.

‡ These authors jointly supervised this work.

## Supplementary Figures

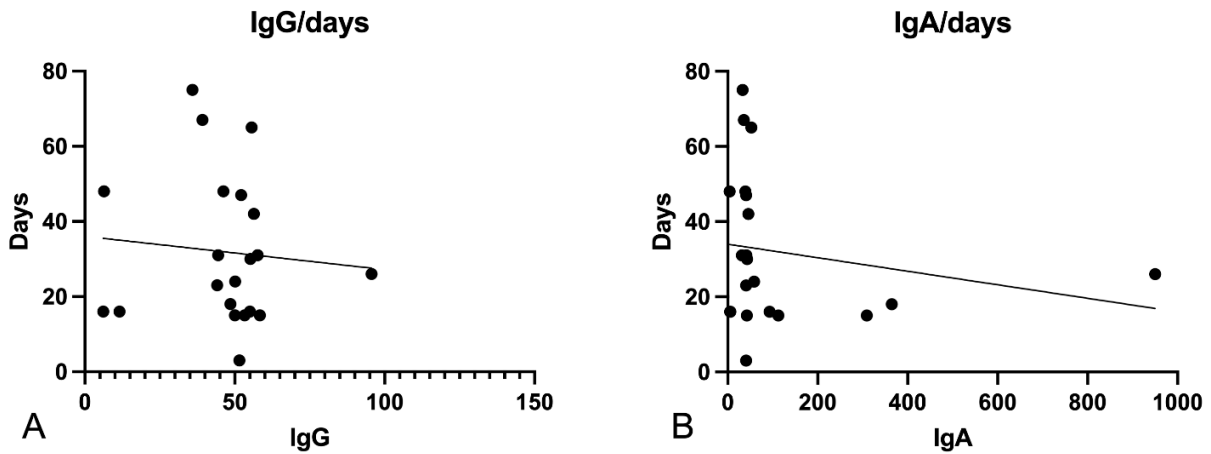

Figure S1. Correlation of IgG (A) or IgA (B) levels and days after vaccination.

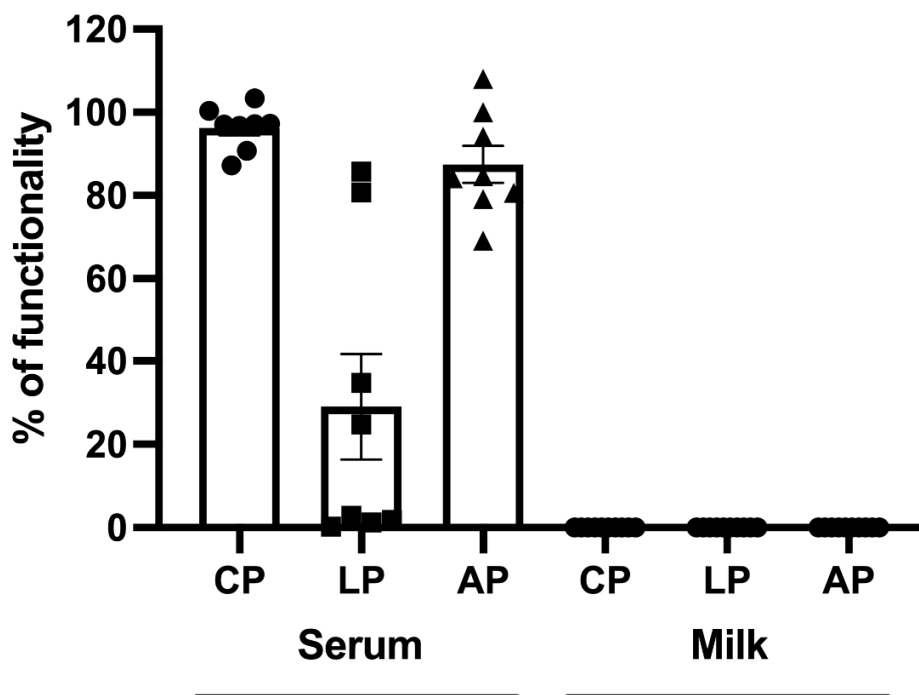

Figure S2. Evaluation of complement (C) functionality in serum and milk samples. Serum and milk samples were tested by Wieslab assay in order to determine their capability of activating the three C pathway: classical (CP), lectin (LP) and alternative (AP). Milk samples failed to determine activation of all the three C cascades, whilst all the sera resulted to be C-sufficient.

## Supplementary Tables

Table S1. Characteristics of the women cohort.

| Patient | Age (years) | Comorbidity | Previous SARS-CoV-2 Infection | Vaccine Type         | Time between Collection and the 2 <sup>nd</sup> Dose of Vaccine (days) | Newborn Age (months) |
|---------|-------------|-------------|-------------------------------|----------------------|------------------------------------------------------------------------|----------------------|
| 1       | 32          | no          | no                            | Pfizer               | 31                                                                     | 10                   |
| 2       | 42          | no          | no                            | AstraZeneca          | 23                                                                     | 31                   |
| 3       | 44          | yes         | no                            | Pfizer               | 18                                                                     | 3                    |
| 4       | 31          | no          | no                            | AstraZeneca + Pfizer | 15                                                                     | 2                    |
| 5       | 41          | no          | no                            | Pfizer               | 15                                                                     | 13                   |
| 6       | 30          | no          | no                            | AstraZeneca          | 20                                                                     | 12                   |
| 7       | 35          | yes         | no                            | Pfizer               | 48                                                                     | 8                    |
| 8       | 34          | yes         | no                            | Moderna              | 15                                                                     | 2                    |
| 9       | 31          | no          | no                            | Moderna              | 42                                                                     | 5                    |
| 10      | 42          | no          | no                            | Pfizer               | 31                                                                     | 20                   |
| 11      | 31          | no          | no                            | Pfizer               | 48                                                                     | 5                    |
| 12      | 45          | no          | no                            | Pfizer               | 47                                                                     | 9                    |
| 13      | 41          | no          | no                            | Pfizer               | 24                                                                     | 19                   |
| 14      | 34          | no          | no                            | Pfizer               | 75                                                                     | 16                   |
| 15      | 43          | no          | no                            | Pfizer               | 30                                                                     | 9                    |
| 16      | 38          | no          | no                            | Pfizer               | 65                                                                     | 4                    |
| 17      | 34          | no          | no                            | Pfizer               | 67                                                                     | 17                   |
| 18      | 34          | no          | yes                           | Pfizer               | 26                                                                     | 14                   |
| 19      | 36          | no          | yes                           | Pfizer               | 15                                                                     | 11                   |
| 20      | 42          | no          | yes                           | Pfizer               | 17                                                                     | 17                   |
| 21      | 33          | yes         | no                            | AstraZeneca          | 16                                                                     | 16                   |
| 22      | 33          | no          | no                            | AstraZeneca          | 16                                                                     | 33                   |

**Table S2. Titration of the calibrator used in ELISA assay.**

| <b>Dilution of Serum Calibrator</b> | <b>Value of Standard Curve</b> | <b>O.D. IgG</b> | <b>O.D. IgA</b> |
|-------------------------------------|--------------------------------|-----------------|-----------------|
| 1:500                               | 0.002                          | 1.165           | 3.436           |
| 1:1000                              | 0.001                          | 1.088           | 2.452           |
| 1:5000                              | 0.0002                         | 0.782           | 1.027           |
| 1:10,000                            | 0.0001                         | 0.652           | 0.397           |
| 1:25,000                            | 0.00004                        | 0.459           | 0.307           |
| 1:50,000                            | 0.00002                        | 0.323           | 0.174           |
| 1:75,000                            | 0.000013                       | 0.311           | 0.155           |
| 1:100,000                           | 0.00001                        | 0.204           | 0.136           |
| 0                                   | 0                              | 0.135           | 0.135           |

Abbreviations: OD, optical density.
